# Supplementary material
Source: PubMed Central journal article supplement (PMC6343488)
Supplement: NIHMS1006523-supplement-1.pdf [file NIHMS1006523-supplement-1.pdf]

**Supplementary Table 1. Structure refinement statistics**

| <b>Structure</b>                                               | <b>5z2t (original)</b>              | <b>6dfy (remodeled)</b>             |
|----------------------------------------------------------------|-------------------------------------|-------------------------------------|
| Resolution range (Å)                                           | 83.3 - 2.62                         | 83.3 - 2.62                         |
| Space group                                                    | <i>P4<sub>1</sub>2<sub>1</sub>2</i> | <i>P4<sub>1</sub>2<sub>1</sub>2</i> |
| Unit cell dimension (Å)                                        |                                     |                                     |
| a                                                              | 51.6                                | 51.6                                |
| b                                                              | 51.6                                | 51.6                                |
| c                                                              | 166.6                               | 166.6                               |
| <i>R</i> -factor (%)                                           | 27.6                                | 24.6                                |
| <i>R</i> -factor (high resolution shell) <sup>b</sup>          | 43.7                                | 42.6                                |
| <i>R</i> <sub>free</sub> (%) <sup>c</sup>                      | 29.9                                | 27.9                                |
| <i>R</i> <sub>free</sub> (high resolution shell) <sup>b</sup>  | 52.3                                | 47.0                                |
| Total number of non-hydrogen atoms                             | 1412                                | 1420                                |
| Protein atoms                                                  | 868                                 | 857                                 |
| DNA atoms                                                      | 533                                 | 551                                 |
| Water molecules                                                | 11                                  | 12                                  |
| R.m.s.d. from ideal geometry                                   |                                     |                                     |
| Bond length (Å)                                                | 0.006                               | 0.006                               |
| Bond angle (°)                                                 | 0.99                                | 0.97                                |
| Wilson <i>B</i> -factor (Å <sup>2</sup> )                      | 72.9                                | 72.9                                |
| Average <i>B</i> -factor macromolecule atoms (Å <sup>2</sup> ) | 77.2                                | 93.3                                |
| Ramachandran statistics (%)                                    |                                     |                                     |
| Most favored region                                            | 95.2                                | 99.0                                |
| Allowed regions                                                | 4.8                                 | 1.0                                 |
| Outlier regions                                                | 0                                   | 0                                   |

<sup>b</sup> Highest resolution shell: 2.717 - 2.622 Å

<sup>c</sup> Calculated for the test-set reflections as defined in the original work[1]
